# Supplementary material
Source: publisher site journal article supplement (https://www.dovepress.com/article/573494)
Supplement: Supplementary file 1 [file 573494%20Supplementary%20Material.pdf]

Figure S1. CONSORT flowchart showing participant flow through the study

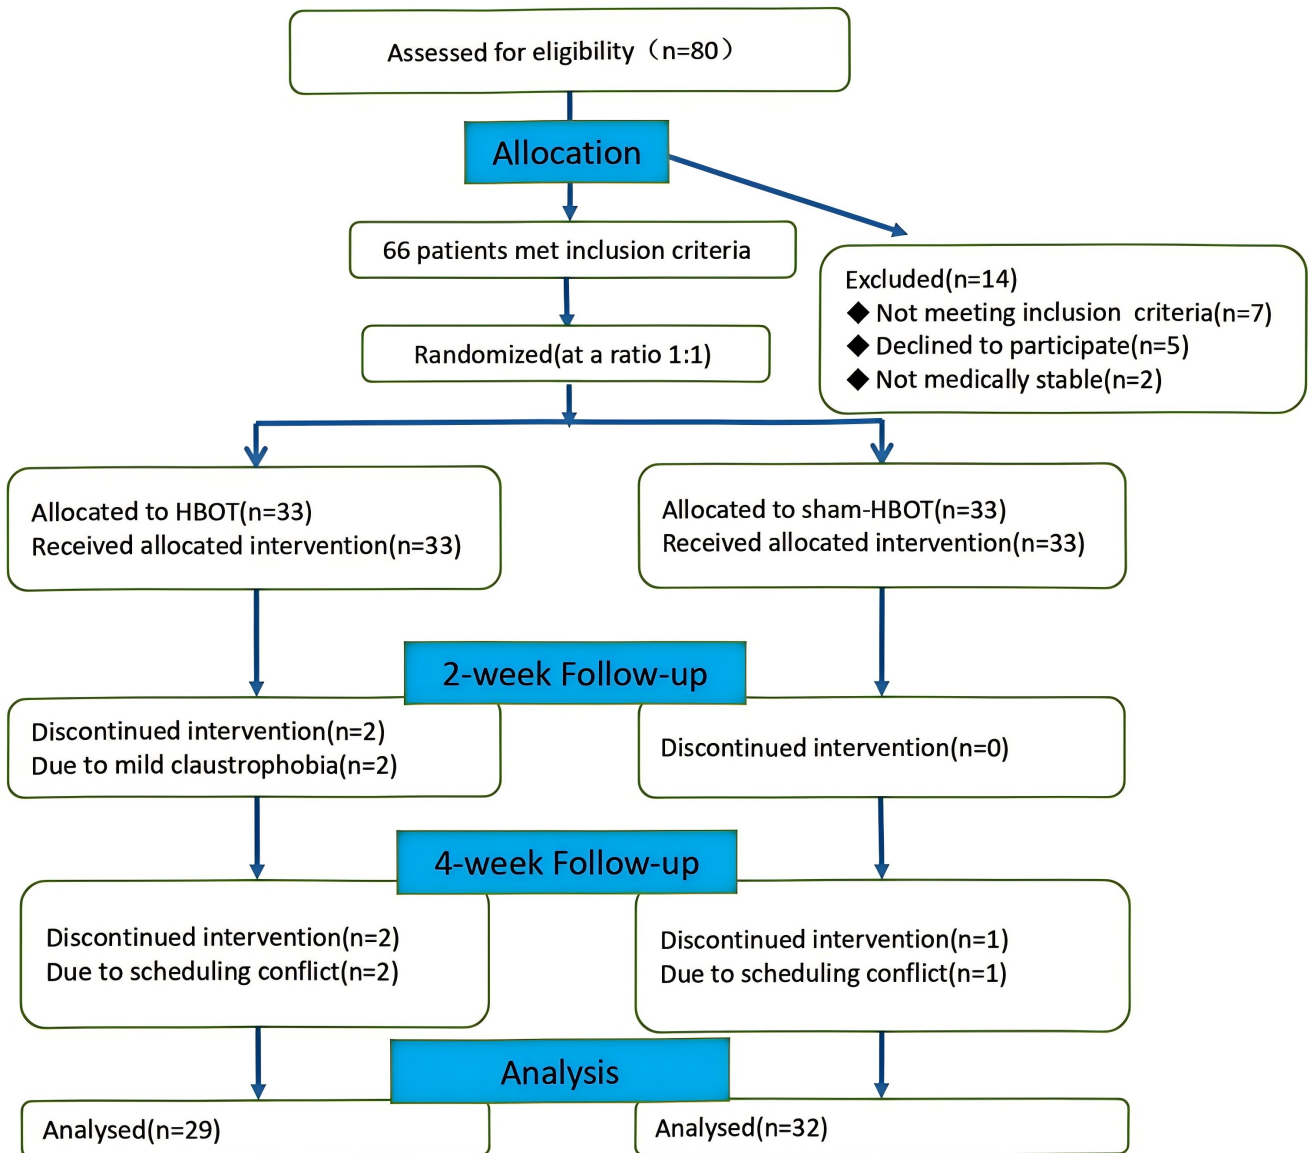

### Supplementary Table S1.

#### Exploratory Subgroup Analyses of HAMD Improvement within the HBOT Group

| Subgroup Variable | Subcategory | n  | HAMD Improvement Mean (SD) | P-value for between-subcategory difference |
|-------------------|-------------|----|----------------------------|--------------------------------------------|
| Stroke Type       | Ischemic    | 10 | -8.40 ± 2.50               | 0.685                                      |
|                   | Hemorrhagic | 19 | -7.89 ± 2.47               |                                            |
| Age               | ≤65 years   | 15 | -7.60 ± 2.38               | 0.636                                      |
|                   | >65 years   | 14 | -8.36 ± 2.59               |                                            |

**Footnote:** HAMD improvement was calculated as baseline score minus week-4 score (a larger negative value indicates greater improvement). Between-subcategory comparisons were performed using independent samples t-tests. These analyses are exploratory and conducted within the HBOT group only.
